# Supplementary material
Source: HighWire-hosted journal article supplement (https://cmajopen-stage.highwire.org/highwire/filestream/81315/field_highwire_adjunct_files/4/strobe.pdf)
Supplement: strobe.pdf [file strobe.pdf]

STROBE Statement—Checklist of items that should be included in reports of *cross-sectional studies*

|                              | <b>Item No</b> | <b>Recommendation</b>                                                                                                                                                                | <b>Page No</b>                                                                                                                       |
|------------------------------|----------------|--------------------------------------------------------------------------------------------------------------------------------------------------------------------------------------|--------------------------------------------------------------------------------------------------------------------------------------|
| <b>Title and abstract</b>    | 1              | (a) Indicate the study’s design with a commonly used term in the title or the abstract                                                                                               | Page 2 see abstract methods “We conducted a cross-sectional analysis”                                                                |
|                              |                | (b) Provide in the abstract an informative and balanced summary of what was done and what was found                                                                                  | Page 2 abstract                                                                                                                      |
| <b>Introduction</b>          |                |                                                                                                                                                                                      |                                                                                                                                      |
| Background/rationale         | 2              | Explain the scientific background and rationale for the investigation being reported                                                                                                 | See paragraph 1 and 2 - page 3                                                                                                       |
| Objectives                   | 3              | State specific objectives, including any prespecified hypotheses                                                                                                                     | See paragraph 3 - page 3                                                                                                             |
| <b>Methods</b>               |                |                                                                                                                                                                                      |                                                                                                                                      |
| Study design                 | 4              | Present key elements of study design early in the paper                                                                                                                              | See first paragraph methods page 3                                                                                                   |
| Setting                      | 5              | Describe the setting, locations, and relevant dates, including periods of recruitment, exposure, follow-up, and data collection                                                      | See study design in methods section Page 3                                                                                           |
| Participants                 | 6              | (a) Give the eligibility criteria, and the sources and methods of selection of participants                                                                                          | All legal outlets operating on November 17 <sup>th</sup> were eligible for participation page 3                                      |
| Variables                    | 7              | Clearly define all outcomes, exposures, predictors, potential confounders, and effect modifiers. Give diagnostic criteria, if applicable                                             | See sources of data page 4                                                                                                           |
| Data sources/<br>measurement | 8*             | For each variable of interest, give sources of data and details of methods of assessment (measurement). Describe comparability of assessment methods if there is more than one group | See sources of data page 4                                                                                                           |
| Bias                         | 9              | Describe any efforts to address potential sources of bias                                                                                                                            | See limitations paragraph page 8                                                                                                     |
| Study size                   | 10             | Explain how the study size was arrived at                                                                                                                                            | See page 3 for outlets, and page 4 for neighbourhoods. Participants were all legal cannabis outlets and all neighbourhoods in Canada |
| Quantitative variables       | 11             | Explain how quantitative variables were handled in the analyses. If applicable, describe which groupings were chosen and why                                                         | See Data Analysis page 4 and 5                                                                                                       |

|                     |     |                                                                                                                                                                                                              |                                                                                                                                                                                                                                   |
|---------------------|-----|--------------------------------------------------------------------------------------------------------------------------------------------------------------------------------------------------------------|-----------------------------------------------------------------------------------------------------------------------------------------------------------------------------------------------------------------------------------|
| Statistical methods | 12  | (a) Describe all statistical methods, including those used to control for confounding                                                                                                                        | See Data Analysis page 4 and 5                                                                                                                                                                                                    |
|                     |     | (b) Describe any methods used to examine subgroups and interactions                                                                                                                                          | See last paragraph page 4 comparing private and public                                                                                                                                                                            |
|                     |     | (c) Explain how missing data were addressed                                                                                                                                                                  | Missing data were excluded from analysis page 5                                                                                                                                                                                   |
|                     |     | (d) If applicable, describe analytical methods taking account of sampling strategy                                                                                                                           | NA = no sampling we included all known legal cannabis stores                                                                                                                                                                      |
|                     |     | (e) Describe any sensitivity analyses                                                                                                                                                                        | See page 5 “we conducted a sensitivity analysis using unadjusted neighbourhood income quintiles from the 2016 census”                                                                                                             |
| <b>Results</b>      |     |                                                                                                                                                                                                              |                                                                                                                                                                                                                                   |
| Participants        | 13* | (a) Report numbers of individuals at each stage of study—eg numbers potentially eligible, examined for eligibility, confirmed eligible, included in the study, completing follow-up, and analysed            | Page 5 first paragraph of results.                                                                                                                                                                                                |
|                     |     | (b) Give reasons for non-participation at each stage                                                                                                                                                         | See page 5 “An additional, six stores had been granted a license to operate but had not yet opened and were excluded from analysis.”                                                                                              |
|                     |     | (c) Consider use of a flow diagram                                                                                                                                                                           | NA                                                                                                                                                                                                                                |
| Descriptive data    | 14* | (a) Give characteristics of study participants (eg demographic, clinical, social) and information on exposures and potential confounders                                                                     | See table 1 on page 6. Study participants were cannabis stores                                                                                                                                                                    |
|                     |     | (b) Indicate number of participants with missing data for each variable of interest                                                                                                                          | See Results first paragraph page 5 “We were not able to find the hours of operation for two stores in Newfoundland & Labrador, these stores were included in the study but excluded from the weekly hours of operation analysis.” |
| Outcome data        | 15* | Report numbers of outcome events or summary measures                                                                                                                                                         | See table 1 on page 6. Outcome events were prespecified measures of cannabis access.                                                                                                                                              |
| Main results        | 16  | (a) Give unadjusted estimates and, if applicable, confounder-adjusted estimates and their precision (eg, 95% confidence interval). Make clear which confounders were adjusted for and why they were included | See table 2 page 7.                                                                                                                                                                                                               |

|                          |    |                                                                                                                                                                            |                                                                                                       |
|--------------------------|----|----------------------------------------------------------------------------------------------------------------------------------------------------------------------------|-------------------------------------------------------------------------------------------------------|
|                          |    | (b) Report category boundaries when continuous variables were categorized                                                                                                  | Income quintiles from the PCCF+ were predefined by statistics Canada. See Page 4 Neighbourhood Income |
|                          |    | (c) If relevant, consider translating estimates of relative risk into absolute risk for a meaningful time period                                                           | Not relevant in this study design                                                                     |
| Other analyses           | 17 | Report other analyses done—eg analyses of subgroups and interactions, and sensitivity analyses                                                                             | See appendix A page 13                                                                                |
| <b>Discussion</b>        |    |                                                                                                                                                                            |                                                                                                       |
| Key results              | 18 | Summarise key results with reference to study objectives                                                                                                                   | See first paragraph page 7                                                                            |
| Limitations              | 19 | Discuss limitations of the study, taking into account sources of potential bias or imprecision. Discuss both direction and magnitude of any potential bias                 | See limitations section page 8                                                                        |
| Interpretation           | 20 | Give a cautious overall interpretation of results considering objectives, limitations, multiplicity of analyses, results from similar studies, and other relevant evidence | See paragraph 2,3 and 4 of the discussion page 8                                                      |
| Generalisability         | 21 | Discuss the generalisability (external validity) of the study results                                                                                                      | See conclusions page 9                                                                                |
| <b>Other information</b> |    |                                                                                                                                                                            |                                                                                                       |
| Funding                  | 22 | Give the source of funding and the role of the funders for the present study and, if applicable, for the original study on which the present article is based              | See Funding page 9                                                                                    |

\*Give information separately for exposed and unexposed groups.

**Note:** An Explanation and Elaboration article discusses each checklist item and gives methodological background and published examples of transparent reporting. The STROBE checklist is best used in conjunction with this article (freely available on the Web sites of PLoS Medicine at <http://www.plosmedicine.org/>, Annals of Internal Medicine at <http://www.annals.org/>, and Epidemiology at <http://www.epidem.com/>). Information on the STROBE Initiative is available at [www.strobe-statement.org](http://www.strobe-statement.org).
